# Supplementary material for: Metabolic flexibility maintains proliferation and migration of FGFR signaling–deficient lymphatic endothelial cells
Source: PubMed Central journal article supplement — J Biol Chem. 2021 Aug 30;297(4):101149. doi: 10.1016/j.jbc.2021.101149 (PMC8498002; doi:10.1016/j.jbc.2021.101149), 2021-08-30
Supplement: mmc1.pdf [file mmc1.pdf]

## Supporting Information

### Metabolic flexibility maintains proliferation and migration of FGFR signaling-deficient lymphatic endothelial cells

Hongyuan Song<sup>1\*</sup>, Jie Zhu<sup>1\*</sup>, Ping Li<sup>1</sup>, Fei Han<sup>1</sup>, Longhou Fang<sup>2,3,4</sup>, and Pengchun Yu<sup>1,5</sup>

<sup>1</sup>Cardiovascular Biology Research Program, Oklahoma Medical Research Foundation, Oklahoma City, OK 73104, USA.

<sup>2</sup>Center for Cardiovascular Regeneration, Department of Cardiovascular Sciences, Houston Methodist Research Institute, Houston, TX 77030, USA.

<sup>3</sup>Department of Ophthalmology, Blanton Eye Institute, Houston Methodist Institute for Academic Medicine, Houston Methodist Research Institute, Houston, TX 77030, USA.

<sup>4</sup>Department of Cardiothoracic Surgeries, Weill Cornell Medical College, Cornell University, New York City, NY 10065, USA.

<sup>5</sup>Department of Cell Biology, University of Oklahoma Health Sciences Center, Oklahoma City, OK 73104, USA.

\* Contributed equally

#### Correspondence:

Pengchun Yu

Cardiovascular Biology Research Program

Oklahoma Medical Research Foundation

825 NE 13th Street, Oklahoma City, OK 73104

Tel: 405-271-4445

Email: [Pengchun-Yu@omrf.org](mailto:Pengchun-Yu@omrf.org)

#### List of Supporting Information

1. Supplemental Figure 1
2. Supplemental Figure 2
3. Supplemental Figure 3

## Supplemental Figure 1

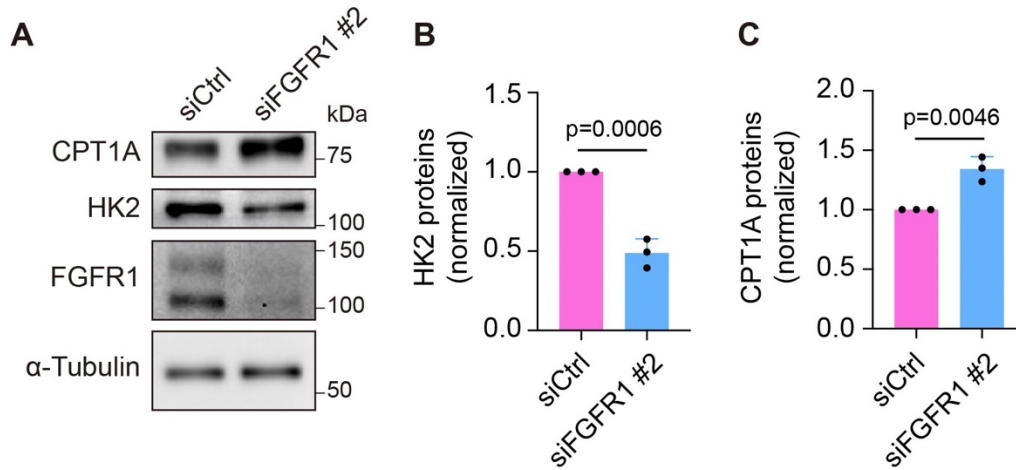

**Supplemental Figure 1: Confirmation of the effect of FGFR1 knockdown on HK2 and CPT1A expression using a second siRNA.** (A) Western blot analysis of CPT1A, HK2, and FGFR1 proteins in HDLECs transfected with control siRNA or a second siRNA targeting FGFR1.  $\alpha$ -Tubulin served as a loading control. (B, C) Densitometric quantification of HK2 proteins (n=3 independent experiments) (B) and CPT1A proteins (n=3 independent experiments) (C). Data represent mean  $\pm$  s.d.; p values were calculated by unpaired *t*-test.

## Supplemental Figure 2

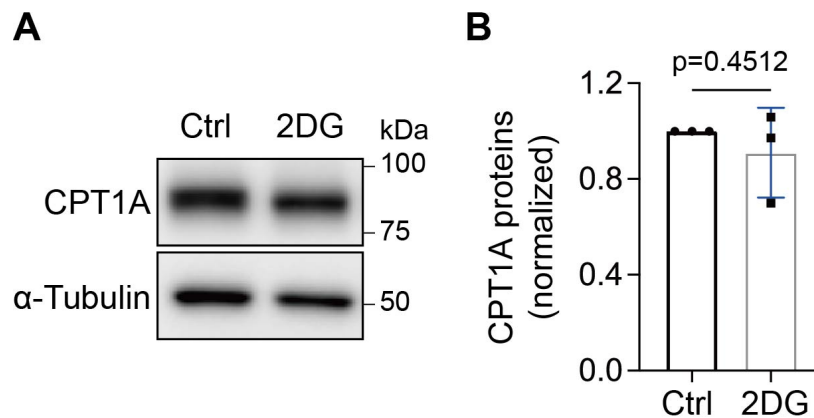

**Supplemental Figure 2: Inhibition of glycolysis per se does not affect CPT1A expression.** (A, B) Western blot analysis (A) and densitometric quantification (n=3 replicates from two independent experiments) (B) of CPT1A proteins in HDLECs treated with vehicle or 2DG.  $\alpha$ -Tubulin served as a loading control. Data represent mean  $\pm$  s.d.; the p value was calculated by unpaired *t*-test.

### Supplemental Figure 3

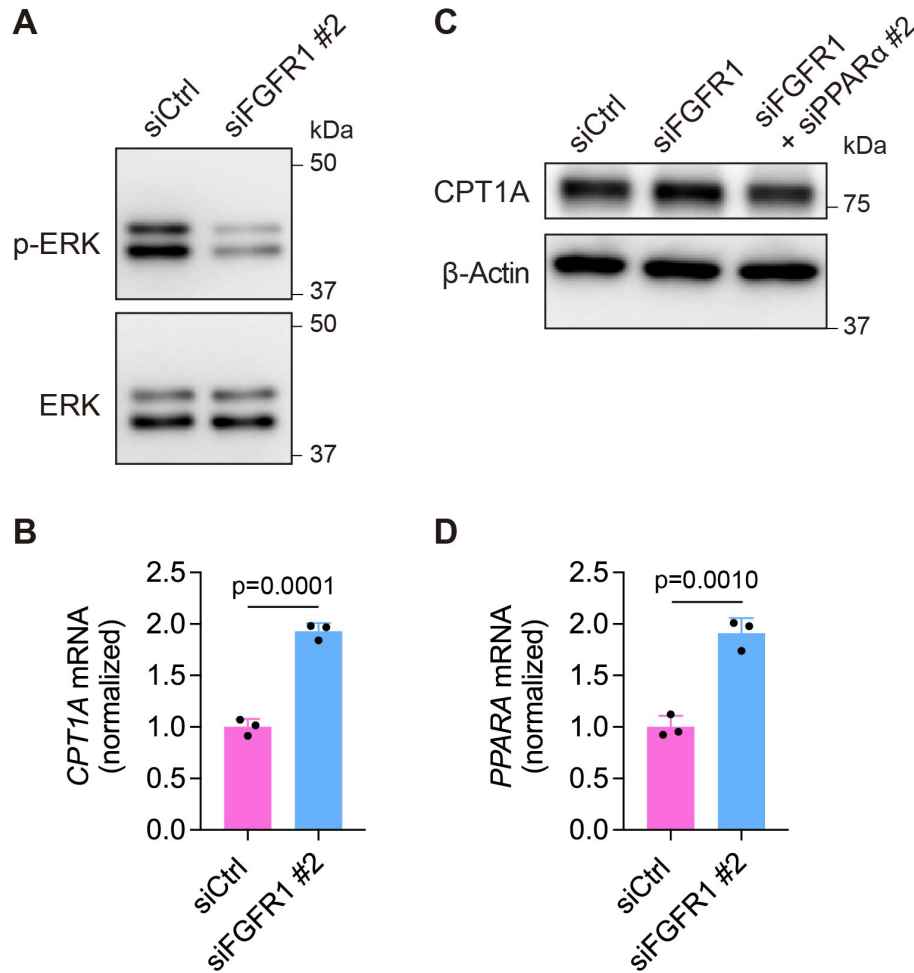

**Supplemental Figure 3: Confirmation of the effect of FGFR1 or PPAR $\alpha$  knockdown using a second siRNA.** (A) Western blot analysis of phosphorylated ERK1/2 (Thr202/Tyr204) and total ERK1/2 in HDLECs transfected with control siRNA or a second siRNA targeting FGFR1 (representative of three independent experiments). (B) qPCR analysis of *CPT1A* mRNA in HDLECs transfected with control siRNA or a second siRNA targeting FGFR1 (n= 3 technical replicates; representative of two independent experiments). (C) Western blot analysis of CPT1A expression in HDLECs transfected control siRNA, FGFR1 siRNA, or a combination of FGFR1 siRNA and a second siRNA targeting PPAR $\alpha$ .  $\beta$ -actin was examined as a loading control. The result is representative of two independent experiments. (D) qPCR analysis of *PPARA* mRNA in HDLECs transfected with control siRNA or a second siRNA targeting FGFR1 (n= 3 technical replicates; representative of two independent experiments). Data represent mean  $\pm$  s.d.; p values were calculated by unpaired *t*-test.
